# Defensive Medicine in Israel – A Nationwide Survey

Elad Asher<sup>1\*</sup>, Sari Greenberg-Dotan<sup>2</sup>, Jonathan Halevy<sup>3</sup>, Shimon Glick<sup>2</sup>, Haim Reuveni<sup>2</sup>

**1** Sheba Medical Center, Tel Hashomer, Ramat-Gan, Israel, **2** Ben-Gurion University of the Negev, Beer-Sheva, Israel, **3** Shaare Zedek Medical Center, Jerusalem, Israel

## Abstract

**Background:** Defensive medicine is the practice of diagnostic or therapeutic measures conducted primarily as a safeguard against possible malpractice liability. We studied the extent, reasons, and characteristics of defensive medicine in the Israeli health care system.

**Methods and Findings:** Cross-sectional study performed in the Israeli health care system between April and July 2008 in a sample (7%) of board certified physicians from eight medical disciplines (internal medicine, pediatrics, general surgery, family medicine, obstetrics and gynecology, orthopedic surgery, cardiology, and neurosurgery). A total of 889 physicians (7% of all Israeli board certified specialists) completed the survey. The majority [60%, (95%CI 0.57–0.63)] reported practicing defensive medicine; 40% (95%CI 0.37–0.43) consider every patient as a potential threat for a medical lawsuit; 25% (95%CI 0.22–0.28) have previously been sued at least once during their career. Independent predictors for practicing defensive medicine were surgical specialty [OR = 1.6 (95%CI 1.2–2.2),  $p = 0.0004$ ], not performing a fellowship abroad [OR = 1.5 (95%CI 1.1–2),  $p = 0.027$ ], and previous exposure to lawsuits [OR = 2.4 (95%CI 1.7–3.4),  $p < 0.0001$ ]. Independent predictors for the risk of being sued during a physician's career were male gender [OR = 1.6 (95%CI 1.1–2.2),  $p = 0.012$ ] and surgery specialty [OR = 3.2 (95%CI 2.4–4.3),  $p < 0.0001$ ] (general surgery, obstetrics and gynecology, orthopedic surgery, and neurosurgery).

**Conclusions:** Defensive medicine is very prevalent in daily physician practice in all medical disciplines. It exposes patients to complications due to unnecessary tests and procedures, affects quality of care and costs, and undermines doctor-patient relationships. Further studies are needed to understand how to minimize defensive medicine resulting from an increased malpractice liability market.

**Citation:** Asher E, Greenberg-Dotan S, Halevy J, Glick S, Reuveni H (2012) Defensive Medicine in Israel – A Nationwide Survey. PLoS ONE 7(8): e42613. doi:10.1371/journal.pone.0042613

**Editor:** Joseph S. Ross, Yale University School of Medicine, United States of America

**Received:** December 11, 2011; **Accepted:** July 10, 2012; **Published:** August 16, 2012

**Copyright:** © 2012 Asher et al. This is an open-access article distributed under the terms of the Creative Commons Attribution License, which permits unrestricted use, distribution, and reproduction in any medium, provided the original author and source are credited.

**Funding:** The study was supported by The Israeli National Institute for Health Policy Research. The funders had no role in study design, data collection and analysis, decision to publish, or preparation of the manuscript.

**Competing Interests:** The authors have declared that no competing interests exist.

\* E-mail: El.asher@gmail.com

## Introduction

Defensive medicine is defined as the ordering of tests, procedures, and visits, or the avoidance of high-risk patients or procedures, primarily to reduce exposure to malpractice liability [1]. Many physicians practice defensive medicine, and this phenomenon is believed to influence all medical fields. Moreover, to avoid lawsuits non-evidence-based procedures are frequently used. This has become deeply ingrained in many physicians' practices resulting in "unconscious" defensive medicine [2]. Defensive medicine is expensive, has no basis in evidence-based studies, and sometimes exposes patients to complications due to unnecessary tests and procedures [3]. The cost of defensive medicine in the United States is estimated to be as high as \$50 billion annually, more than the costs for the treatment of hypertension and chronic obstructive pulmonary disease combined [2,3]. Defensive medicine has been reported in the United States and elsewhere [1,2,4]. Its prevalence was found to be as high as 93% among high-risk specialty physicians in Pennsylvania [5]. Moreover, 6 specialties (emergency medicine, general surgery, neurosurgery, obstetrics/gynecology, orthopedic surgery, and radiology) were identified as being especially affected by high and rising liability costs [5]. In Israel data about defensive medicine is lacking. Only small studies issued this phenomenon

and none of them was related to the extent of it [2,6,7]. Defensive medicine prevalence and characteristics remain controversial [8,9] and to date no nationwide survey has been done to evaluate this phenomenon. In this study we performed for the first time a nationwide study to measure the extent and characteristics of defensive medicine among Israeli board certified expert physicians from high- and low-risk specialties.

## Methods

### Israeli Healthcare and Malpractice Systems

Israel has maintained a system of socialized health care since its establishment in 1948. In 2010, there were 25,542 doctors in Israel – 3.36 doctors for every 1,000 people. Since 1995 all Israeli citizens are entitled by law to the same health care Uniform Benefits Package, for example: medical diagnosis and treatment, preventive medicine, hospitalization (general, maternity, psychiatric, and chronic), surgery and transplants, preventive dental care for children, and first aid. In cross-country comparisons between health care systems in the Organization for Economic Cooperation and Development (OECD) countries, the Israeli healthcare system was similar to the quality of care and technologically advanced to these countries. The Israeli malpractice system is somewhat similar to the U.S. malpractice system and

there are no features like a no-fault system. In the previous few years, there were between 4200–4500 medical lawsuits in Israel every year and the average compensation for every patient was \$62,000 in the years 2008/9 compared to only \$22,000 5 years earlier [10]. Researchers from the Faculty of Health Sciences and the Guilford Glazer School of Business and Management at the Ben-Gurion University of the Negev collaborated with the Israel Medical Association (IMA) to conduct the study. The IMA is the official organization representing the physicians in Israel. The survey was supported by the Israel national institute for health policy research.

### Study Design and Population

A stratified random sample of board-certified expert physicians (aged 28–65 years) from eight major medical disciplines: internal medicine, pediatrics, general surgery, family medicine, obstetrics and gynecology, orthopedic surgery, cardiology, and neurosurgery, was drawn from the IMA data bases. A computer program randomly sampled every 7th physician in specialties with more than 1000 physicians, every 5th physician in specialties with 500–1000 physicians, and every 2nd physician in specialties with fewer than 500 physicians. At least 8% of the physicians in each specialty were sampled with the exception of neurosurgeons, who were over sampled [31 of 66 (47%)] to ensure adequate representation due to the small number of neurosurgeons in Israel. The sample size was calculated to provide 80% power to detect differences of 10% or more between specialty groups at the  $p < 0.05$  level. Three surveyors conducted the calls from the IMA office after having participated in a teaching and practice session. Responders and non-responders were statistically similar with regard to gender distribution and average age. According to the academic medical center at the Ben Gurion University, ethical approval for this study was deemed unnecessary since this study was a physician's survey and no patient was included. Every physician was verbally consented to participate in the survey at the time of the telephone interview.

### Survey Development and Administration

A seven-page, telephone-administered, confidential questionnaire was developed by a team of board certified physicians, lawyers, and specialists in health systems management and ethics. Some questions were translated from a previous questionnaire, after permission of the corresponding author [5]. For validation, a preliminary study was conducted among 20 specialist physicians. After comments, the final questionnaire was approved. None of the 20 physicians used in the validation participated in the study. The final questionnaire contained questions addressing demographics, occupation, insurance and liability, experience with malpractice claims, direct and indirect questions about defensive medicine, reasons for performing defensive medicine, and questions regarding ways to minimize defensive medicine. Physicians were asked to rate their answers on a 5-point scale (1 – lowest, 5 – highest). The survey is proprietary and therefore cannot be made publicly available.

### Survey Content and Main Outcome Measures

All Physicians were asked about their concerns regarding malpractice liability and whether it caused them to act in each of four forms of “assurance” behavior: (1) order more tests than medically indicated; (2) prescribe more medications than medically indicated; (3) refer to specialists in unnecessary circumstances; and (4) suggest invasive procedures against professional judgment. Physicians used the same 5 point scale to rate the frequency with which they practiced two forms of avoidance behavior: (1) avoid

conducting certain procedures/interventions and (2) avoid caring for high-risk patients. Physicians who reported engaging in any of these defensive medicine practices were then asked in an open-ended question to describe their most recent act of defensive medicine. Finally, physicians were asked about ways to minimize the need to practice defensive medicine.

### Statistical Analysis

Two logistic regression models, based on enter methods, were conducted. Outcomes of each were:

1. “Sued previously for medical malpractice” – this variable includes all physicians who had previously been sued.
2. “Practices defensive medicine” – was based on a direct question “In order to avoid complaints and lawsuits, do you practice defensive medicine?”

The independent variables were included due to significant results in a univariate analysis that was established as a first stage, or due to their potentially impact on the relationship between the outcome variable and the main independent variables. Predictor's variables were: age, gender, professional satisfaction, place of medical school graduation, private malpractice insurance, previous exposure to a lawsuit, main practice location, performing a fellowship outside of Israel and type of specialty. All tests were two-sided, and values of  $p < 0.05$  were considered statistically significant, using SPSS 15 (SPSS Inc., Chicago, IL).

## Results

### Physician Characteristics

During a four-month period, a total of 1800 physicians were approached, of whom 889 completed the survey (50% response rate). Table 1 presents physician characteristics. Twelve physicians who practice only medical administration were excluded. The remaining 877 (98.7%) comprised the study population, representing 7% of all Israeli board certified specialists. Of them, 640 (73%) were men; mean age was 51.29 years (median 53 years). Five hundred sixty-seven physicians (65%) graduated in Israel, 94 (11%) in the former Soviet Union, 64 (7%) in Italy and 152 (17%) in other countries. Responders and non-responders were similar ( $p = 0.5$ ) in terms of age and sex. Of the 877 physicians included in the final analysis, 189 (22%) were pediatricians, 169 (19%) were internists, 127 (14%) were obstetricians and gynecologists, 112 (13%) were orthopedic surgeons, 111 (13%) were family medicine practitioners, 82 (9%) were general surgeons, 56 (6%) were cardiologists, and 31 (4%) were neurosurgeons. Three hundred and forty-seven (40%) physicians completed a fellowship outside Israel. The main practice locations were hospital 428 (49%) ambulatory clinics 268 (31%) a combination of hospital and ambulatory clinics 169 (19%) and other places 12 (1%).

**Working as physicians.** The majority of the physicians 808 (92%) was satisfied or very satisfied with their profession. Overall, 431 (49%) claimed it was hard to find new fellowship candidates in their field of expertise. Only 188 (21%) thought that the reason had to do with defensive medicine (of them, 40% are gynecologists). One hundred and seventeen physicians (13%) stated that at least one candidate for fellowship had told them he was concerned about the liability atmosphere in medicine (of them, 45% gynecologists).

### Malpractice insurance policy

When working in the public sector (hospitals and health maintenance organizations-HMO's), physicians had malpractice

**Table 1. Physicians' Characteristics.**

| Characteristic                                                           | No. (%) of Physicians (N = 877) |
|--------------------------------------------------------------------------|---------------------------------|
| <b>Specialty</b>                                                         |                                 |
| Pediatrics                                                               | 189 (22%)                       |
| Internal medicine                                                        | 169 (19%)                       |
| Obstetrics and gynecology                                                | 127 (14%)                       |
| Orthopedic surgery                                                       | 112 (13%)                       |
| Family medicine                                                          | 111 (13%)                       |
| General surgery                                                          | 82 (9%)                         |
| Cardiology                                                               | 56 (6%)                         |
| Neurosurgery                                                             | 31 (4%)                         |
| <b>Sex</b>                                                               |                                 |
| Male                                                                     | 640 (73%)                       |
| Female                                                                   | 237 (27%)                       |
| <b>Received degree</b>                                                   |                                 |
| Israel                                                                   | 579 (66%)                       |
| Former Soviet Union                                                      | 94 (11%)                        |
| Italy                                                                    | 64 (7%)                         |
| Hungary                                                                  | 6 (<1%)                         |
| United States                                                            | 5 (<1%)                         |
| Other                                                                    | 141 (16%)                       |
| <b>Fellowship</b>                                                        |                                 |
| Outside of Israel                                                        | 347 (40%)                       |
| Did not have fellowship abroad                                           | 530 (60%)                       |
| <b>Main Place of Practice</b>                                            |                                 |
| Hospital                                                                 | 428 (49%)                       |
| Ambulatory clinics                                                       | 268 (31%)                       |
| Hospital and ambulatory clinics                                          | 169 (19%)                       |
| Other                                                                    | 12 (1%)                         |
| <b>Medical Insurance</b>                                                 |                                 |
| Malpractice insurance provided by employer                               | 757 (86%)                       |
| Private malpractice insurance                                            | 8 (1%)                          |
| Private malpractice insurance in addition to employer-provided insurance | 109 (12%)                       |

doi:10.1371/journal.pone.0042613.t001

insurance as part of employment contracts, which includes private practice. Seven hundred and sixty (87%) had their malpractice insurance provided by their employer, 109 (12%) had private malpractice insurance in addition to their employer insurance, and 8 (1%) had only a private malpractice insurance policy. The majority 603 (69%) believed that the malpractice insurance would cover all of their needs in case of a malpractice lawsuit.

**Exposure to medical lawsuits.** Two hundred and nineteen [25% (95% CI 22%, 28%)] participating physicians have previously been sued at least once during their career. In addition, the names of 253 physicians [29% (95% CI 26%, 32%)] have been mentioned in indirect lawsuits in the past, and complaint letters have been served against 233 [27% (95% CI 24%, 30%)] in recent years. Figure 1 shows the percentage of board certified physicians (n = 219) exposed to lawsuits in each of the eight studied specialties. Figure 2 describes the main reasons for complaint letters.

### Defensive medicine and daily practice

The majority of the physicians [756, 86%, (95% CI 84%, 88%)] claimed that the increased rate of medical lawsuits in Israel

prevents them from giving their patients the best medical treatment possible. Moreover, 64 [7%, (95% CI 6%, 9%)] reported stopping their practice or eliminating high-risk procedures three years before the survey due to fear of medical lawsuits. One hundred and fifty-seven physicians [18% (95% CI 16%, 20%)] think there is a possibility that in the next few years they would stop practicing or eliminate high-risk procedures due to fear of medical lawsuits and 69 [8% (95% CI 6%, 10%)] consider stopping direct patient care entirely for the same reason. Table 2 describes the assurance and avoidance behaviors of physicians practicing defensive medicine in daily practice.

Five hundred and twenty-six [60% (95% CI 57%, 63%)] physicians admitted to practicing defensive medicine. Almost half of the physicians [347, 40% (95% CI 36%, 43%)] consider every patient as a potential threat for a medical lawsuit. One hundred eighty-two [21% (95% CI 18%, 24%)] are less frank with their patients due to defensive medicine, and almost all study participants [813, 93% (95% CI 90%, 94%)] think patients and their families have become more demanding in recent years. Seven hundred twelve physicians [81%, (95% CI 78%, 84%)]

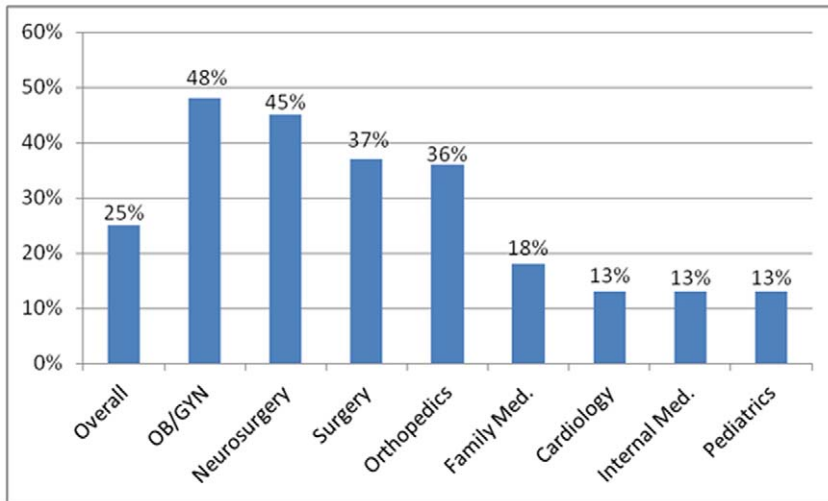

**Figure 1. Percentage of board certified physicians (n = 219) exposed to lawsuits in each of the eight studied specialties.**  
doi:10.1371/journal.pone.0042613.g001

think that the recently developed culture of high lawsuit and compensation rates influence the Health Maintenance Organizations' (HMOs) policy. Financially, 484 [55% (95% CI 52%, 58%)] described using more health care resources, resulting in higher medical costs due to defensive medicine. Seven hundred and thirty-four [84% (95% CI 81%, 86%)] stated that this cost will not prevent them from practicing defensive medicine in the future (see Tables 3 and 4).

**Ways to reduce lawsuits and complaints**

When asked about ways to reduce lawsuits and complaints, and hence defensive medicine, most study participants suggested

medical debriefing in any event that might harm the patient, and improving the quality of care. Nevertheless, when asked if in today's medico-legal reality, they think they should report medical care mistakes to an internal working place committee, 456 physicians [52% (95% CI 49%, 55%)] replied they would do so only if they would be offered anonymity, or if they would be provided with lawsuit immunity, otherwise they would not be willing to report such mistakes in any case (See Figure 3).

**Multivariate logistic regression model analysis**

Multivariate logistic regression model analysis showed that only surgery specialty [OR = 3 (95% CI 2.42–4.2), *p*<0.0001] (general

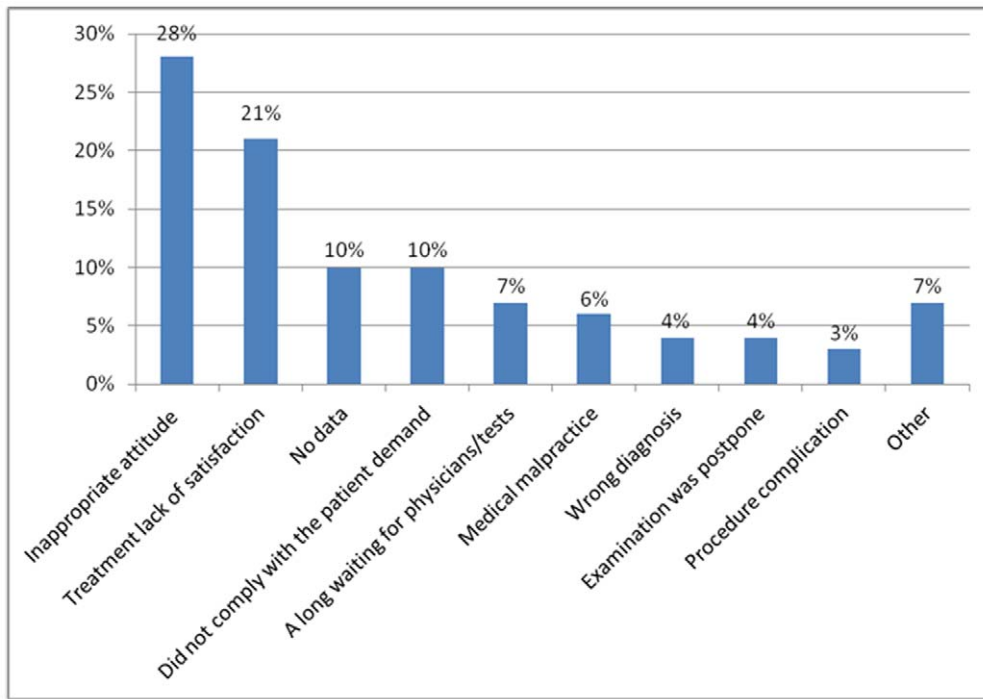

**Figure 2. Main reasons for complaint letters against physicians (n = 233).**  
doi:10.1371/journal.pone.0042613.g002

**Table 2.** Defensive medicine in daily practice (n = 877 physicians).

|                                                                                          |                       |
|------------------------------------------------------------------------------------------|-----------------------|
| Practice defensive medicine to greater extent in recent years                            | 60% (95%CI 0.57–0.63) |
| Perform more tests (e.g., blood tests; chest x-rays; brain CT) due to defensive medicine | 59% (95%CI 0.56–0.62) |
| Refer more patients to consultants in unnecessary circumstances                          | 50% (95%CI 0.47–0.53) |
| Admit more patients unnecessarily                                                        | 30% (95%CI 0.27–0.33) |
| Suggest invasive procedures (e.g., biopsies) to confirm diagnoses                        | 24% (95%CI 0.21–0.27) |
| Prescribe more medications than indicated                                                | 12% (95%CI 0.1–0.14)  |
| Avoid certain procedures or interventions                                                | 17% (95%CI 0.15–0.2)  |
| Stop practicing or eliminate high-risk procedures                                        | 7% (95%CI 0.05–0.09)  |

CT – computerized tomography.  
doi:10.1371/journal.pone.0042613.t002

surgery, obstetrics and gynecology, orthopedic surgery, and neurosurgery) and male gender [OR = 1.6 (95%CI 1.1–2.2),  $p = 0.012$ ] were independent predictors for the risk of being sued during a physician’s career. Independent predictors for practicing defensive medicine were surgical specialty [OR = 1.6 (95%CI 1.2–2.2),  $p = 0.0004$ ], not performing a fellowship outside of Israel [OR = 1.5 (95%CI 1.1–2),  $p = 0.027$ ], and previous exposure to a lawsuit [OR = 2.4 (95%CI 1.7–3.4),  $p < 0.0001$ ].

**Discussion**

This is the first nationwide survey regarding the practice of defensive medicine performed among board certified expert physicians from eight medical disciplines (surgical and non-surgical). Previous surveys have focused on physicians subjected to relatively low levels of litigation [11–13] and were often limited to single specialties, such as obstetrics and gynecology [14,15]. Another large survey was conducted in Pennsylvania among 824 high risk specialist physicians in a volatile malpractice environment [5].

In the current study, we included four major disciplines of medicine and four specialties that are at greater risk of litigation. Our study was not limited to a certain area or a single specialty, nor was it limited to high risk or low risk specialists alone.

**The extent of defensive medicine in Israel**

Sixty percent of physicians were routinely practicing defensive medicine. These findings are similar to the reported prevalence of

**Table 3.** Determinants of “Sued previously for medical malpractice” in a multivariate analysis.\*

| Variable                     | OR (95% CI)     | Pv      |
|------------------------------|-----------------|---------|
| Surgical specialty           | 3 (2.2–4.2)     | <0.0001 |
| Gender (men)                 | 1.6 (1.1–2.2)   | 0.012   |
| Age (≥50 years)              | 1.4 (0.97–2)    | 0.077   |
| Fellowship outside of Israel | 0.93 (0.66–1.3) | 0.661   |
| Graduated in Israel          | 0.96 (0.7–1.3)  | 0.822   |
| Work in hospitals            | 0.96 (0.68–1.4) | 0.825   |
| Managerial job               | 1.2 (0.9–1.7)   | 0.201   |
| Professional satisfaction    | 1.01 (0.61–1.8) | 0.870   |
| Private insurance            | 0.96 (0.63–1.5) | 0.848   |

\*Logistic regression.  
doi:10.1371/journal.pone.0042613.t003

**Table 4.** Determinants of “Practices defensive medicine” in a multi variant analysis.\*

| Variable                                               | OR (95% CI)      | Pv      |
|--------------------------------------------------------|------------------|---------|
| Surgical specialty                                     | 1.6 (1.2–2.2)    | 0.004   |
| Fellowship outside of Israel                           | 1.5 (1.1–2)      | 0.027   |
| Previous exposure to a lawsuit or to complaint letters | 2.4 (1.7–3.4)    | <0.0001 |
| Age (≥50 years)                                        | 0.73 (0.53–0.99) | 0.048   |
| Gender (men)                                           | 0.94 (0.66–1.3)  | 0.717   |
| Graduated in Israel                                    | 0.84 (0.62–1.2)  | 0.277   |
| Working in hospital                                    | 0.72 (0.51–1.01) | 0.060   |
| Managerial job                                         | 1.05 (0.76–1.5)  | 0.749   |
| Professional satisfaction                              | 0.79 (0.46–1.34) | 0.376   |
| Private insurance                                      | 0.91 (0.59–1.4)  | 0.647   |

\*Logistic regression.  
doi:10.1371/journal.pone.0042613.t004

defensive medicine in Australia [16], England [4] and the United States [5], where as many as 46%, 75%, and 93% of physicians, respectively, reported practicing defensive medicine. In Australia and England the surveys were limited to only one specialty-general practitioners, whereas in the United States the survey included six specialties (emergency medicine, general surgery, orthopedic surgery, neurosurgery, obstetrics/gynecology, and radiology), but was limited to Pennsylvania and was conducted in a volatile malpractice environment. These results suggest that defensive medicine is a well-embedded medical practice in industrialized countries. At least 50% of the physicians from every western country surveyed practice defensive medicine [1,2,4–5,12–13,16–17].

**Impact of defensive medicine on patient treatment**

Little is known about whether defensive medicine reduces or improves quality of care. In our study, physicians were ordering unnecessary diagnostic tests, referring patients to unnecessary consultants, and hospitalizing patients unnecessarily. Simple diagnostic testing, such as blood tests, may be annoying but are not harmful to most patients. However, invasive procedures such as catheterizations and procedures involving radiation, as computed tomography, can cause radiation exposure and serious adverse effects [18,19].

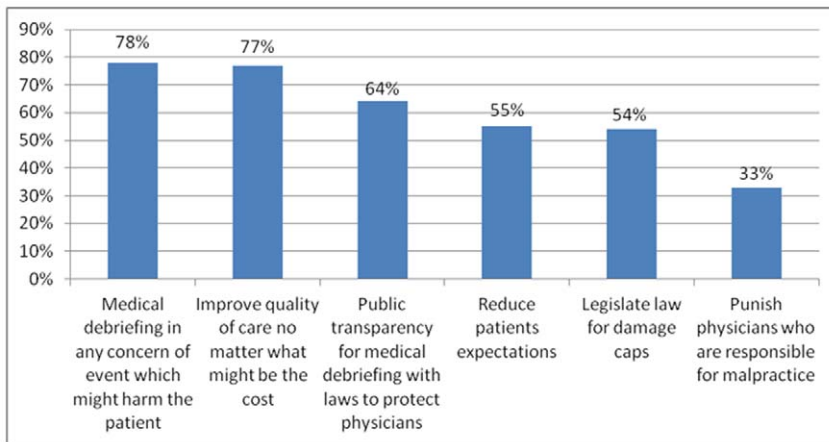

**Figure 3. Physicians' suggestions to reduce lawsuits and complaints.\***  
doi:10.1371/journal.pone.0042613.g003

Of greater concern is the fact that 40% of physicians consider every patient they treat as a potential threat for a medical lawsuit, and as a result, 21% stated they are less frank with their patients. Some perform unnecessary procedures such as caesarean sections in order to avoid lawsuits; some are forced to perform life resuscitations and intubations, by senior physicians in their department, on patients that had a poor prognosis in order to avoid litigation by patients' family members. Therefore, it is not surprising that 81% of physicians think the recent culture of frequent lawsuits and compensation rates influence HMOs' policies.

### Defensive medicine and physician behavior

One out of four physicians had previously been sued during their career; one out of three received a complaint letter within the two years prior to the survey. Not surprising is the fact that physicians' liability experience and exposure were the most prominent single independent predictor for practicing defensive medicine. These results suggest that some patients who are seen as demanding, emotional, or unpredictable may prompt physicians to behave defensively. We found support for our findings in the United States, where similar practice patterns have been reported in teaching behaviors because of concerns about malpractice litigation [20,21]. As a result, physicians' past experience of liability affects clinical decision-making processes and influences individual physicians' propensity to practice defensively [5,21–24]. Nevertheless, in the United States, physicians' liability experience was not a predictor for practicing defensive medicine [5]. This major difference might be explained by the fact that our study population represents the major disciplines in medicine and not only high risk specialist physicians working in a volatile malpractice environment who are more concerned about liability, and hence practice defensive medicine regardless of previous lawsuits. Moreover, the situation in Israel, which is presented in the paper, is that the malpractice fee is paid by the Institutions and not by the doctors out of pocket. Therefore, the defensive medicine that is practiced in Israel is not mainly for financial reason. Our findings support a recent study from the United States where it was estimated that by the age of 65 years, 75% of physicians in low risk specialties would have faced a malpractice claim, compared with 99% of physicians in high-risk specialties [25].

### Ways to reduce lawsuits and complaints

Creating solutions to reduce the practice of defensive medicine is a challenging task, mainly because reliable empirical evidence on the subject remains limited. Defensive behaviors may reduce access to care and even cause physical harm [26–30]. Most physicians in our study suggested that reduced numbers of lawsuits and complaints may occur in the presence of medical debriefing in every medical event that might harm the patient and by improving the quality of care no matter what the costs are. Nevertheless, when asked if in today's medico-legal reality they would report medical mistakes, the majority of physicians replied they would not do so, probably because they do not trust the system. The literature regarding solutions for this phenomenon is poor [27]. Moreover, no study, to the best of our knowledge, has examined ways to deal with defensive medicine. The nature of its causes and effects are the subject of constant debate. Though many think that malpractice reform will reduce defensive medicine, they often disagree, due to lack of evidence, about which methods of such reform would be most effective and appropriate [28].

### Study limitations

Objective methods for measuring defensive medicine are almost impossible [1,2,9] because distinctions between inappropriate and appropriate care are not clear in many clinical situations [1,5,29]. It is also difficult to identify the difference between liability-related motivators and other factors that influence clinical decision making. Another limitation is that physician self-reports of defensive medicine may be biased, and may lead physicians to overstate the frequency of performing defensive medicine. In contrast, unconscious defensive medicine is not reported by physicians but it is also widely practiced [1,2]. Nevertheless, our nationwide survey of physicians from eight medical disciplines (surgical and non-surgical) represents the best possible picture concerning defensive medicine in a single country.

### Conclusions

Defensive medicine is very prevalent in Israel. It is more prevalent among surgical specialists and among physicians with previous exposure to lawsuits. The most frequent daily practice of defensive medicine is performing more unnecessary tests and referring more patients to consultants and hospitalization. This study should provoke researchers to study how to minimize

defensive medicine in terms of cost and quality of care, and regain trust in physician-patient relationships.

## Acknowledgments

The authors would like to thank the Israeli Medical Association for the collaboration and excellent assistance. The authors are fully indebted to the physicians who participated in this survey.

## References

1. US Congress Office of Technology Assessment (1994) Defensive medicine and medical malpractice. Publication OTA-H-602. Washington, DC: US Government Printing Office.
2. Asher E, Parag Y, Zeller L, Yerushalmi R, Reuveni H (2007) Unconscious defensive medicine: The case of erythrocyte sedimentation rate. *Eur J Intern Med* 18(1): 35–38.
3. Kessler D, McClellan M (1996) Do doctors practice defensive medicine? *Q J Econ* 111: 353–359.
4. Summerton N (1995) Positive and negative factors in defensive medicine: a questionnaire study of general practitioners. *BMJ* 310(6971): 27–29.
5. Studdert D, Mello M, Sage W, DesRoches C, Peugh J, et al. (2005) Defensive medicine among high-risk specialist physicians in a volatile malpractice environment. *JAMA* 293(21): 2609–2617.
6. Toker A, Shvarts S, Perry ZH, Doron Y, Reuveni H (2004) Clinical guidelines, defensive medicine, and the physician between the two. *Am J Otolaryngol* 25(4):245–50.
7. Bleich A, Baruch Y, Hirschmann S, Lubin G, Melamed, et al. (2011) Management of the suicidal patient in the era of defensive medicine: focus on suicide risk assessment and boundaries of responsibility. *Isr Med Assoc J* 13(11):653–6.
8. Mello MM, Brennan TA (2002) Deterrence of medical errors. *Tex Law Rev* 80: 1595–1637.
9. Anderson RE (1999) Billions for Defense: The Pervasive Nature of Defensive Medicine. *Arch Intern Med* 159: 2399–2402.
10. Asher E, Reuveni H (2010) Defensive medicine – The phenomena and its impact on the Israeli Healthcare system. *Economic and Social Aspects of Israeli's Healthcare System*. 110–120; Gabi Bin Nun G, Magnezi R.
11. Avraham R (2011) Clinical practice guidelines: the warped incentives in the U.S. healthcare system. *Am J Law Med* 37:7–40.
12. Cook WR, Neff C (1994) Attitudes of physicians in northern Ontario to medical malpractice litigation. *Can Fam Physician* 40: 689–698.
13. Passmore K, Leung WC (2002) Defensive practice among psychiatrists. *Postgrad Med J* 78: 671–673.
14. Ennis M, Clark A, Grudzinskas JG (1991) Change in obstetric practice in response to fear of litigation in the British Isles. *Lancet* 338: 616–618.
15. Sloan FA, Whetten-Goldstein K, Githens PB, Entman SE (1995) Effects of the threat of medical malpractice litigation and other factors on birth outcomes. *Med Care* 33: 700–714.
16. Girgis S, Ward JE, Thomson CJ (1999) General practitioners' perceptions of medicolegal risk using case scenarios to assess the potential impact of prostate cancer screening guidelines. *MJA* 171: 362–366.
17. Hiyama T, Yoshihara M, Tanaka S, Urabe Y, Ikegami Y, et al. (2006) Defensive medicine practice among gastroenterologists in Japan. *World J Gastroenterol* 12(47): 7671–7675.
18. Ziakas A, Klinkle P, Mildnerberger R, Fretz E, Williams MB, et al. (2004) Comparison of the radial and femoral approaches in left main PCI: a retrospective study. *J Invasive Cardiol* 16(3): 129–132.
19. Huda W, Schoepf UJ, Abro JA, Mah E, Costello P (2011) Radiation-related cancer risks in a clinical patient population undergoing cardiac CT. *Am J Roentgenol* 196(2): W159–165.
20. Leask K (2005) The role of the courts in clinical decision making. *Arch Dis Child* 90(12): 1256–1258.
21. Reed DA, Windish DM, Levine RB, Kravet SJ, Wolfe L, et al. (2008) Do fears of malpractice litigation influence teaching behaviors? *Teach Learn Med* 20(3): 205–211.
22. Baldwin L, Hart LG, Lloyd M, Fordyce M, Rosenblatt RA (1995) Defensive medicine and obstetrics. *JAMA* 274: 1606–1610.
23. Glassman PA, Rolph JE, Petersen LP, Bradley MA, Kravitz RL (1996) Physicians' personal malpractice experiences are not related to defensive clinical practices. *J Health Polit Policy Law* 21: 219–241.
24. Goyert GL, Bottoms SF, Treadwell MC, Nehra PC (1989) The physician factor in cesarean birth rates. *N Engl J Med* 320: 706–709.
25. Jena AB, Seabury S, Lakdawalla D, Chandra A (2011) Malpractice risk according to physician specialty. *N Engl J Med* 365(7): 629–636.
26. Weisman CS, Teitelbaum MA, Morlock LL (1988) Malpractice claims experience associated with fertility control services among young obstetrician-gynecologists. *Med Care* 26: 298–306.
27. Sclar DI, Housman MG (2003) Medical Malpractice and Physician Liability: Examining Alternatives to Defensive Medicine. *HHPR* 4(1): 75–84.
28. Michota FA, Donnelly MJ (2009) Medicolegal issues in perioperative medicine: Lessons from real cases. *Cleve Clin J Med* 76(4): S119–125.
29. Eddy DM (1998) Performance measurement: problems and solutions. *Health Affairs (Millwood)* 17: 7–25.
30. Tippet TM (2010) Health care reform 2009–2010: a neurosurgeon's perspective. *J Neurosurg* 113(6): 1127–1132.

## Author Contributions

Analyzed the data: EA SGD. Contributed reagents/materials/analysis tools: EA JH SG HR. Wrote the paper: EA HR.
